# Supplementary material for: Nonaqueous hybrid redox flow energy storage with a sodium–TEMPO chemistry and a single-ion solid electrolyte separator
Source: Royal Society of Chemistry journal article supplement (doi:10.1039/d1ya00010a), 2021-11-03
Supplement: d1ya00010a1.pdf [file d1ya00010a1.pdf]

## ***Supplementary Information***

for *Energy Advances*, DOI: 10.1039/ ((please add manuscript number))

### **Nonaqueous Hybrid Redox Flow Energy Storage with a Sodium-TEMPO Chemistry and a Single-ion Solid Electrolyte Separator**

*Xingwen Yu and Arumugam Manthiram\**

Materials Science and Engineering Program and Texas Materials Institute, The University of Texas at Austin, Austin, TX 78712, USA

#### **Corresponding Author**

\*E-mail: manth@austin.utexas.edu

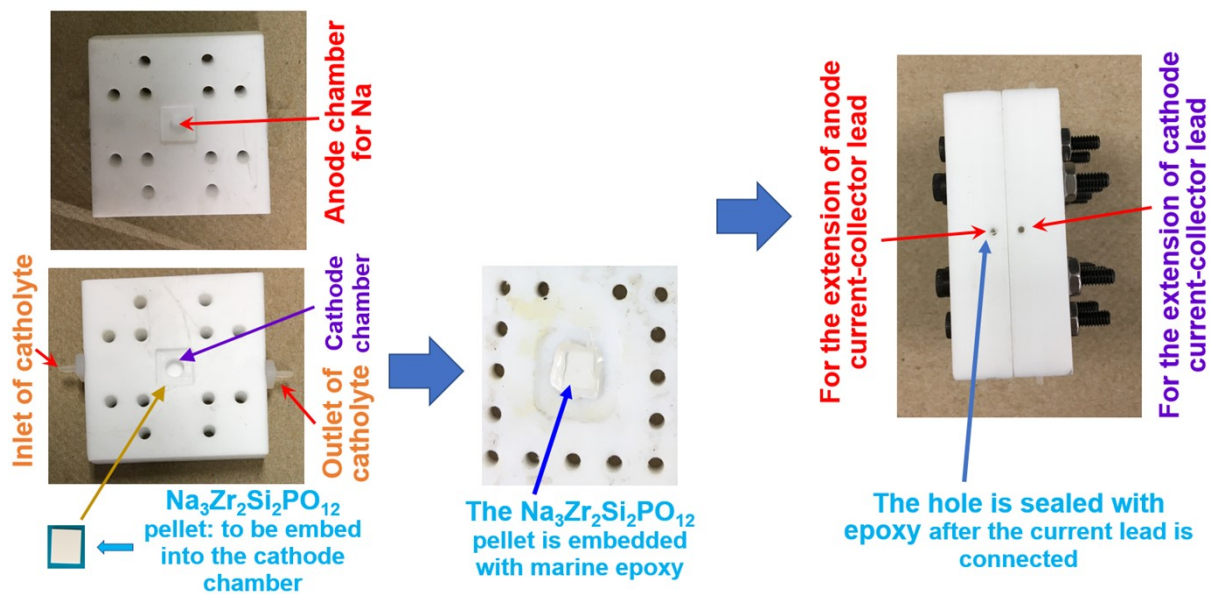

**Fig. S1.** Cell parts and the assembly of a nonaqueous HFB.

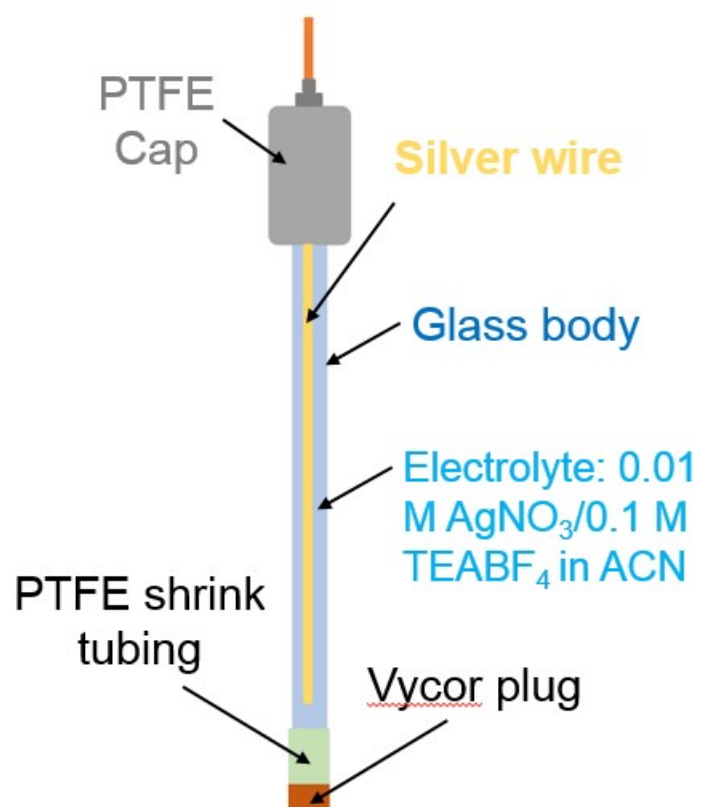

**Fig. S2.** Schematic of the assembly of an in-house designed nonaqueous  $\text{Ag}^+/\text{Ag}$  reference electrode.

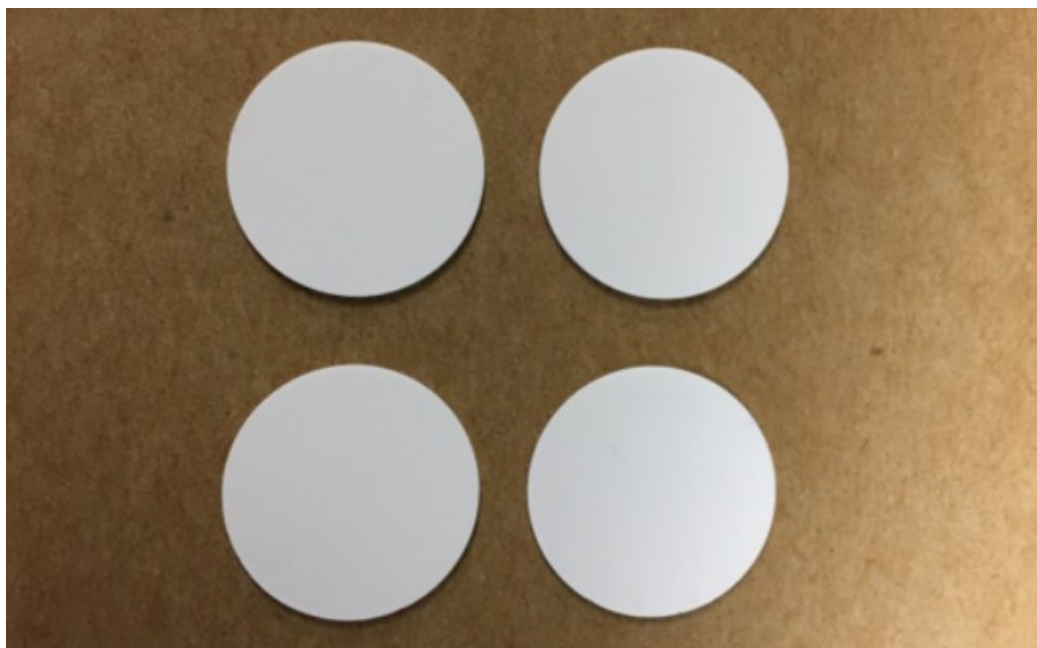

**Fig. S3.** Image of  $\text{Na}_3\text{Zr}_2\text{Si}_2\text{PO}_{12}$  solid electrolyte pellets.

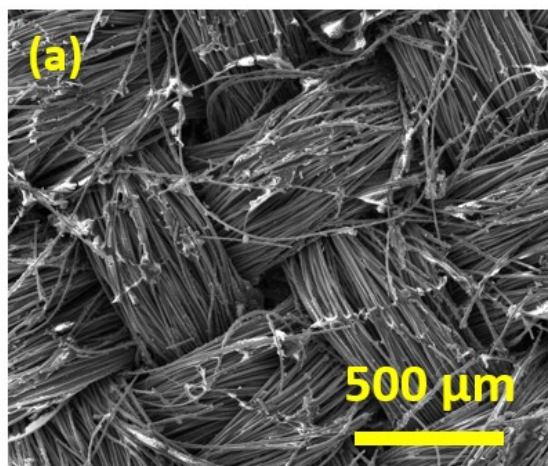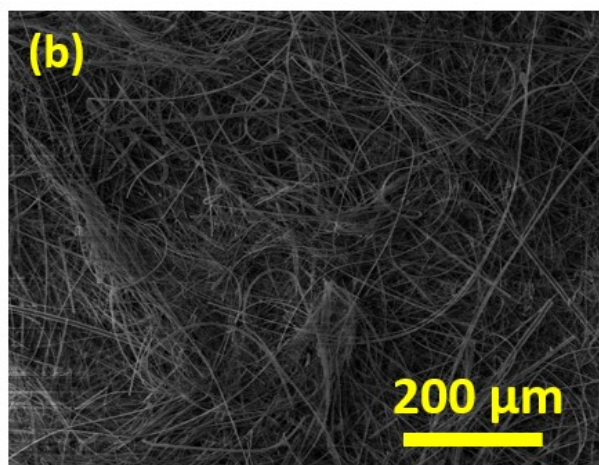

**Fig. S4.** (a) SEM image of a cycled carbon cloth electrode matrix. (b) SEM image of a cycled glass fiber interlayer.

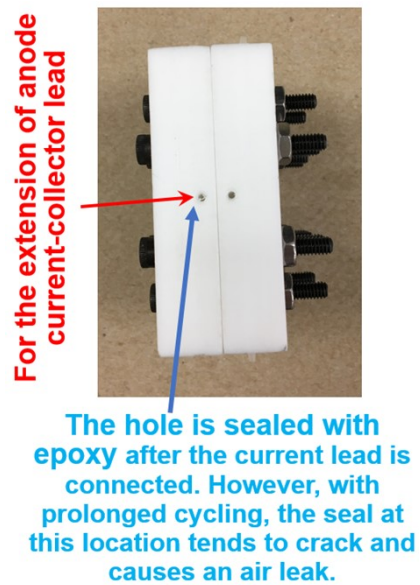

**Fig. S5.** The possible location where the leakage occurs during the operation of HFB.
